# Supplementary material for: Size control and immobilization of gold nanoparticles stabilized in an ionic liquid on glass substrates for plasmonic applications
Source: Royal Society of Chemistry journal article supplement (doi:10.1039/b914230d), 2009-09-16
Supplement: b914230d.pdf [file b914230d.pdf]

Electronic Supplementary Information

## Size Control and Immobilization of Gold Nanoparticles Stabilized in an Ionic Liquid on Glass Substrates for Plasmonic Applications

Tatsuya Kameyama,<sup>a</sup> Yumi Ohno,<sup>a</sup> Takashi Kurimoto,<sup>a</sup> Ken-ichi Okazaki,<sup>a</sup>  
Taro Uematsu,<sup>b</sup> Susumu Kuwabata<sup>b,c</sup> and Tsukasa Torimoto<sup>\*a,c</sup>

<sup>a</sup> Department of Crystalline Materials Science, Graduate School of Engineering, Nagoya University, Chikusa-ku, Nagoya, 464-8603, Japan E-mail: torimoto@apchem.nagoya-u.ac.jp; Fax: +81-52-789-5299; Tel: +81-52-789-4614

<sup>b</sup> Department of Applied Chemistry, Graduate School of Engineering, Osaka University, Suita, Osaka, 565-0871, Japan

<sup>c</sup> Japan Science and Technology Agency, CREST, Kawaguchi, Saitama, 332-0012, Japan

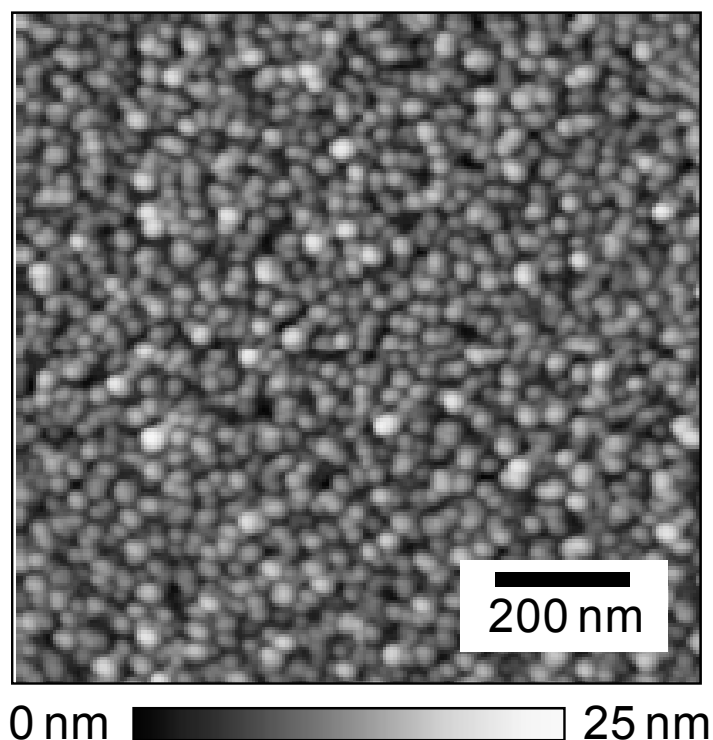

**Fig. S1** AFM image of Au-NP(L)/(PSS/PDDA)<sub>40</sub>/CdTe(Red). The RMS roughness is estimated to be 3.3 nm.
